# Supplementary material
Source: PubMed Central journal article supplement (PMC5576216)
Supplement: Supp_Fig1.pdf [file Supp_Fig1.pdf]

## SUPPLEMENTARY DATA

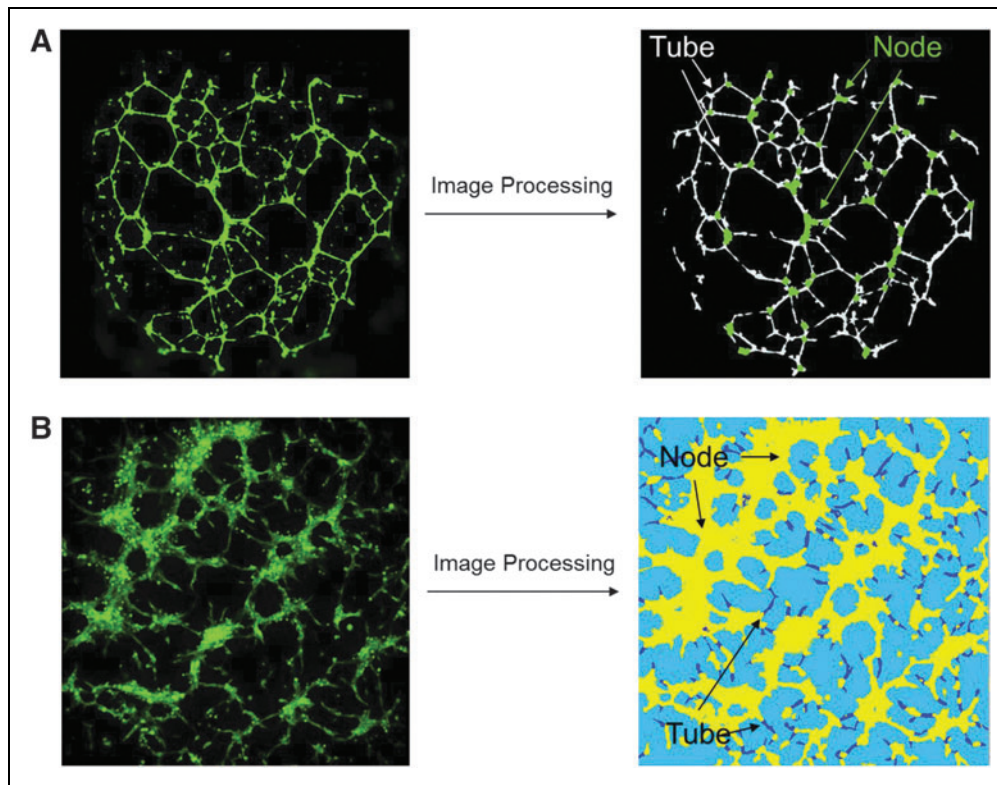

**Supplementary Fig. S1.** Image processing for the Geltrex™ (A) and SP-105 hydrogel (B) experiments. For Geltrex image processing (A), the node area is shown in *green* and tubes are shown in *white*. Whereas for the SP-105 hydrogel image processing (B), the node area is in *yellow* and the tube or protrusions are in *dark blue*.
