# Supplementary material
Source: PubMed Central journal article supplement (PMC5576216)
Supplement: Supp_Fig2.pdf [file Supp_Fig2.pdf]

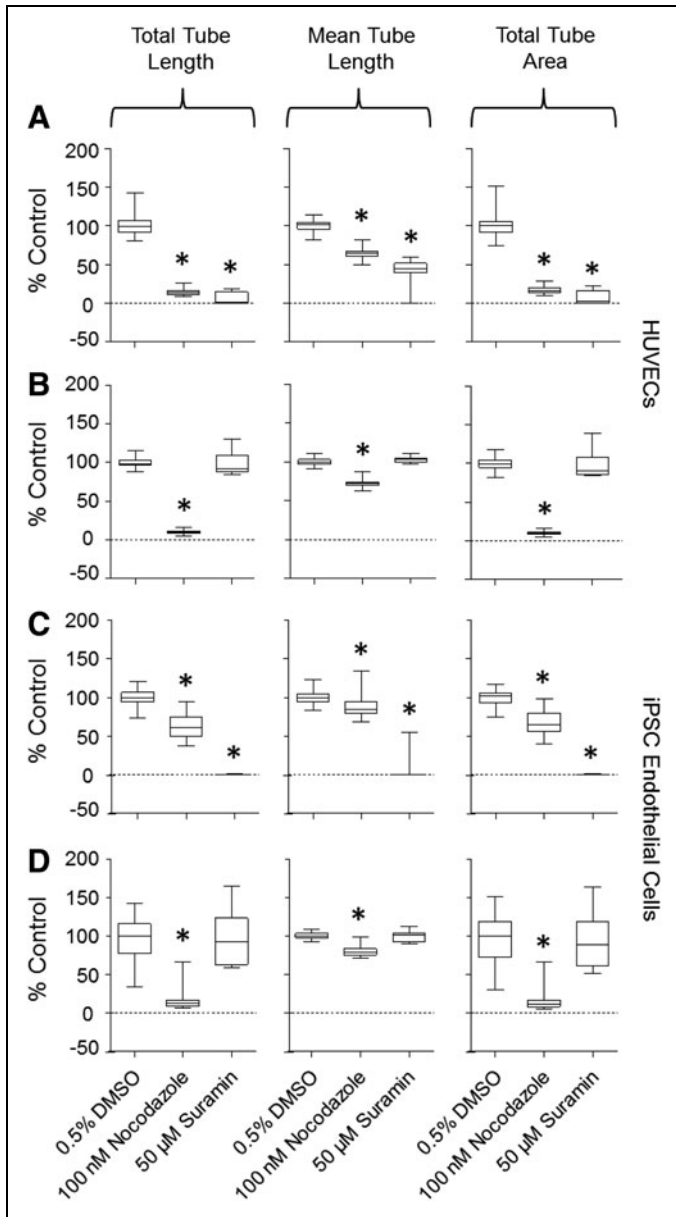

**Supplementary Fig. S2.** Effect of positive control chemicals on angiogenesis using HUVECs (A, B) and iPSC-derived ECs (C, D) on both Geltrex™ (A, C) and SP-105 hydrogel (B, D) extracellular matrices. Positive control chemicals used for the calculation of Z'-factor are shown, including 100 nM nocodazole and 50 μM suramin. Whiskers indicate the Max and Min of data. Sample size ranges from 18 to 36. Statistical significance, *P* value <0.05 is notated with \*. Statistics based on one-way ANOVA with a Dunnett's test. EC, endothelial cell; HUVEC, human umbilical vein endothelial cell; iPSC, induced pluripotent stem cell.
