# Supplementary material
Source: PubMed Central journal article supplement (PMC5576216)
Supplement: Supp_Fig3.pdf [file Supp_Fig3.pdf]

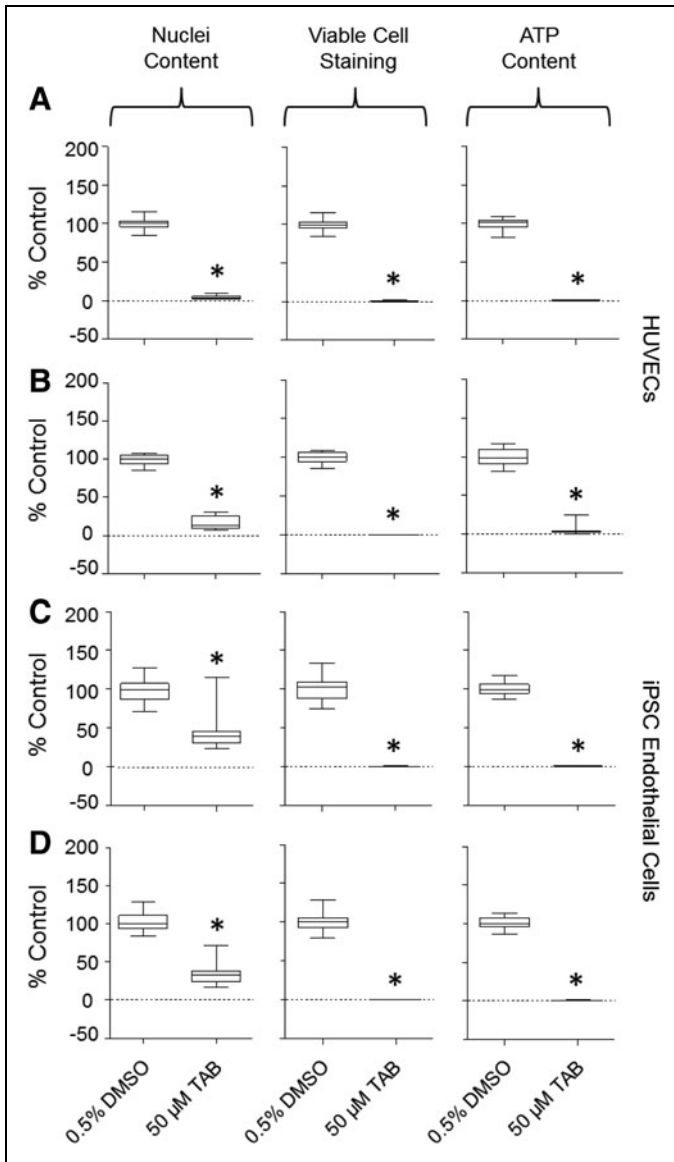

**Supplementary Fig. S3.** Effect of positive control chemicals on cytotoxicity using HUVECs (**A, B**) and iPSC-derived ECs (**C, D**) after 24-h chemical treatment with (**A, C**) and without (**B, D**) cytokine exposure. Positive control chemicals used for the calculation of Z'-factor are shown, 50  $\mu$ M TAB. *Whiskers* indicate the Max and Min of data. Sample size ranges from 12 to 36. Statistical significance, *P* value <0.05 is notated with \*. Statistics based on two-tailed unpaired *t*-test.
