# Supplementary material
Source: PubMed Central journal article supplement (PMC5576216)
Supplement: Supp_Table1.pdf [file Supp_Table1.pdf]

**Supplementary Table S1. Number of Cells Needed for Assays**

| Experiment—cell          | Cells/well | Cells needed for 384 wells |
|--------------------------|------------|----------------------------|
| Geltrex—HUVECs           | 3,500      | 1,344,000                  |
| Geltrex—iPSC-ECs         | 7,500      | 2,880,000                  |
| SP-105 hydrogel—HUVECs   | 6,125      | 2,352,000                  |
| SP-105 hydrogel—iPSC-ECs | 3,500      | 1,344,000                  |
| Cytotox—HUVECs           | 750        | 288,000                    |
| Cytotox—iPSC-ECs         | 750        | 288,000                    |

EC, endothelial cell; HUVEC, human umbilical vein endothelial cell; iPSC, induced pluripotent stem cell.
