# Supplementary material
Source: PubMed Central journal article supplement (PMC5576216)
Supplement: Supp_Table2.pdf [file Supp_Table2.pdf]

**Supplementary Table S2. Concentration–Response Analysis–Cytotoxicity of Angiogenic Controls**

| Metric               | Chemical   | Average POD values $\pm$ SD <sup>a</sup> |
|----------------------|------------|------------------------------------------|
| Nuclei content       | Nocodazole | $>1.0 \pm 0.0$                           |
|                      | Suramin    | $>50 \pm 0.0$                            |
|                      | SU5402     | $25 \pm 35$                              |
|                      | TAB        | $0.33 \pm 0.33$                          |
| Viable cell staining | Nocodazole | $>1.0 \pm 0.0$                           |
|                      | Suramin    | $>50 \pm 0.0$                            |
|                      | SU5402     | $25 \pm 35$                              |
|                      | TAB        | $0.23 \pm 0.18$                          |
| ATP content          | Nocodazole | $0.60 \pm 0.16$                          |
|                      | Suramin    | $>50 \pm 0.0$                            |
|                      | SU5402     | $6.7 \pm 3.4$                            |
|                      | TAB        | $0.028 \pm 0.0048$                       |

<sup>a</sup>Value ( $\mu$ M) at which the concentration–response fit curve crosses beyond 1 SD of the mean control value. Values shown represent the mean and SD of the single curve fit for three separate experiments each containing three replicates per concentration.

POD, point-of-departure; SD, standard deviation; TAB, tetraoctylammonium bromide.
